# Supplementary material for: Solvent effects on the excited-state double proton transfer mechanism in the 7-azaindole dimer: a TDDFT study with the polarizable continuum model
Source: Royal Society of Chemistry journal article supplement (doi:10.1039/c7cp04942k), 2017-01-01
Supplement: c7cp04942k1.pdf [file c7cp04942k1.pdf]

**ELECTRONIC SUPPLEMENTARY INFORMATION - ESI**

**Solvent Effect on the Excited-State Double Proton Transfer Mechanism in 7-Azaindole Dimer: A TDDFT Study with Polarizable Continuum Model**

Xue-fang Yu, Shohei Yamazaki, Tetsuya Taketsugu

**Table S1.** PCM parameters in all solvents.

| solvent                    | hexane | heptane | cyclohexane | benzene | diethyl ether | chloroform | dichloromethane | methanol | acetonitrile | water |
|----------------------------|--------|---------|-------------|---------|---------------|------------|-----------------|----------|--------------|-------|
| static dielectric constant | 1.88   | 1.92    | 2.02        | 2.25    | 4.34          | 4.90       | 8.93            | 32.63    | 36.64        | 78.39 |
| optical analog             | 1.918  | 1.918   | 2.028       | 2.24    | 1.830         | 2.085      | 2.028           | 1.758    | 1.806        | 1.776 |
| solvent radius             | 3.74   | 3.12    | 2.82        | 2.63    | 3.46          | 2.48       | 2.94            | 1.86     | 2.15         | 1.385 |

**Table S2.** Electronic energy for the highest point in the concerted and stepwise reaction paths in LE state, relative to ND<sub>LE</sub> (in kcal/mol) under non-equilibrium solvent effect.

| solvent                          | heptane | cyclohexane | benzene | diethyl<br>ether | chloroform | dichlorom<br>ethane | methanol | acetonitrile | water |
|----------------------------------|---------|-------------|---------|------------------|------------|---------------------|----------|--------------|-------|
| static<br>dielectric<br>constant | 1.92    | 2.02        | 2.25    | 4.34             | 4.90       | 8.93                | 32.63    | 36.64        | 78.39 |
| TS <sub>LE</sub>                 | 6.79    | 6.81        | 6.83    |                  |            |                     |          |              |       |
| TS <sub>LE1</sub>                |         |             |         | 6.80             | 6.83       | 6.83                | 6.86     | 6.86         | 6.87  |
| TS <sub>LE2</sub>                |         |             |         | 4.74             | 4.79       | 4.85                | 4.88     | 4.89         | 4.90  |

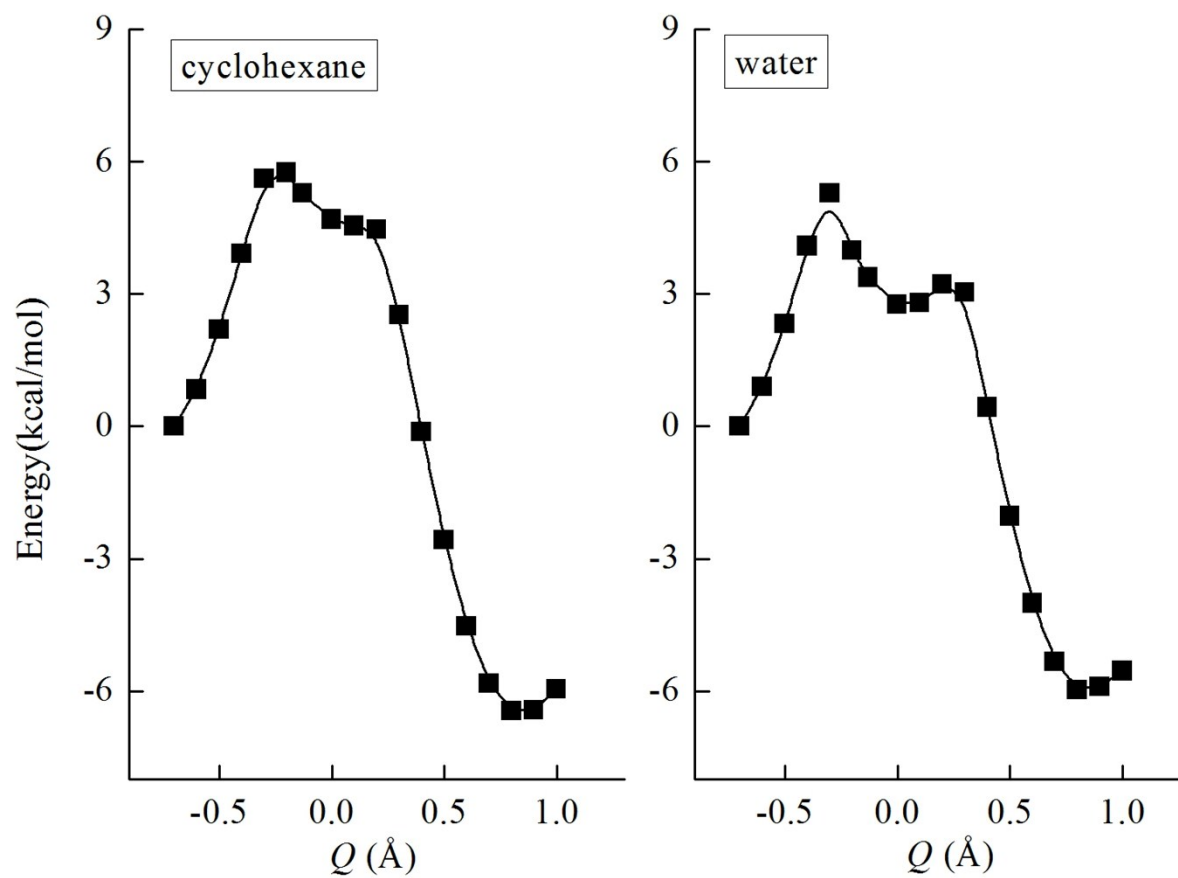

Figure S1. Potential energy profile along MEP in LE state as a function of the reaction coordinate  $Q$  in cyclohexane and water at the TD-CAM-B3LYP/6-31+G\* level.

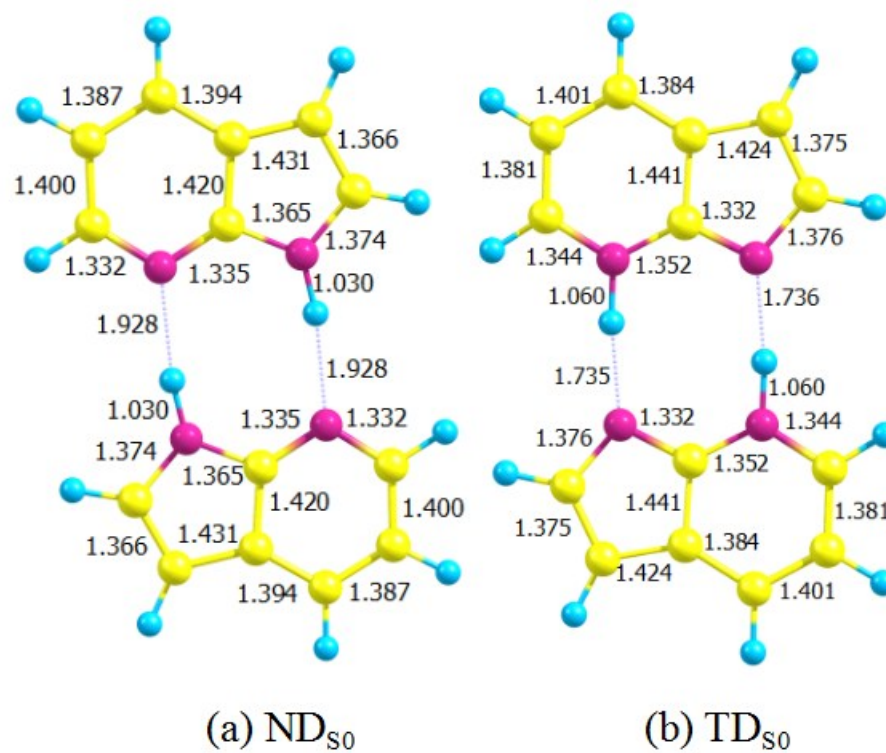

Figure S2. Equilibrium geometries of 7AI dimer in the  $\text{S}_0$  state: (a)  $\text{ND}_{\text{S}_0}$  and (b)  $\text{TD}_{\text{S}_0}$  optimized at the CAM-B3LYP level in the gas phase.

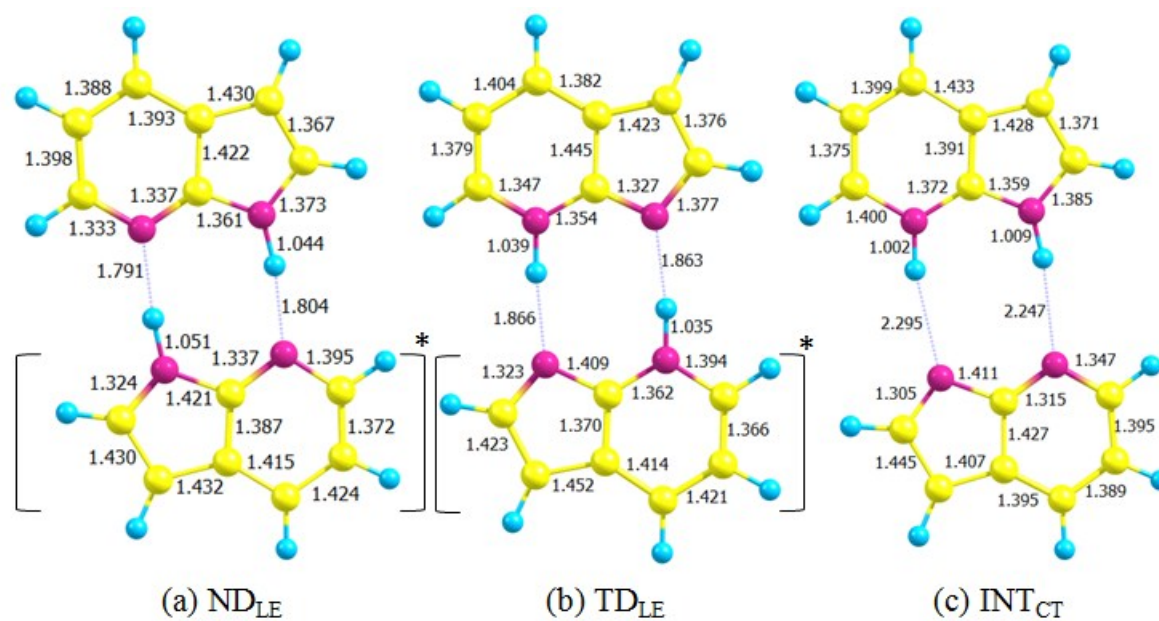

Figure S3. Equilibrium geometries of 7AI dimer in the  $S_1$  state, optimized at the TD-CAM-B3LYP level: (a) ND<sub>LE</sub>, (b) TD<sub>LE</sub> and (c) INT<sub>CT</sub> in the gas phase.

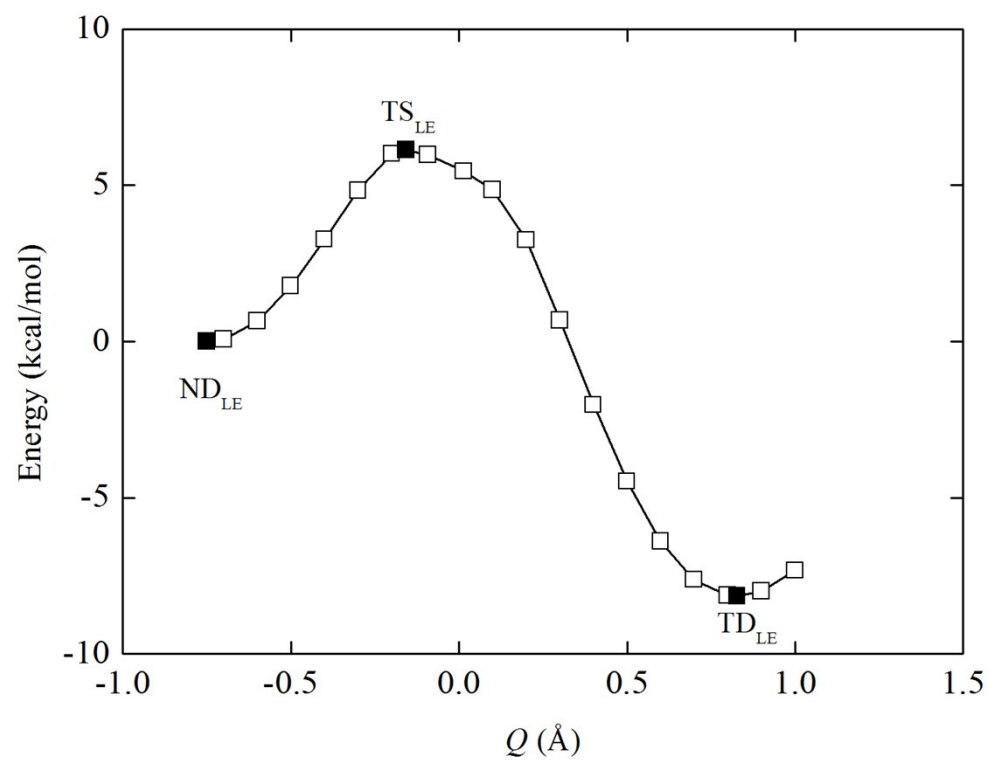

Figure S4. Potential energy profile along MEP in LE state as a function of the reaction coordinate  $Q$  in the gas phase at the TD-CAM-B3LYP level.

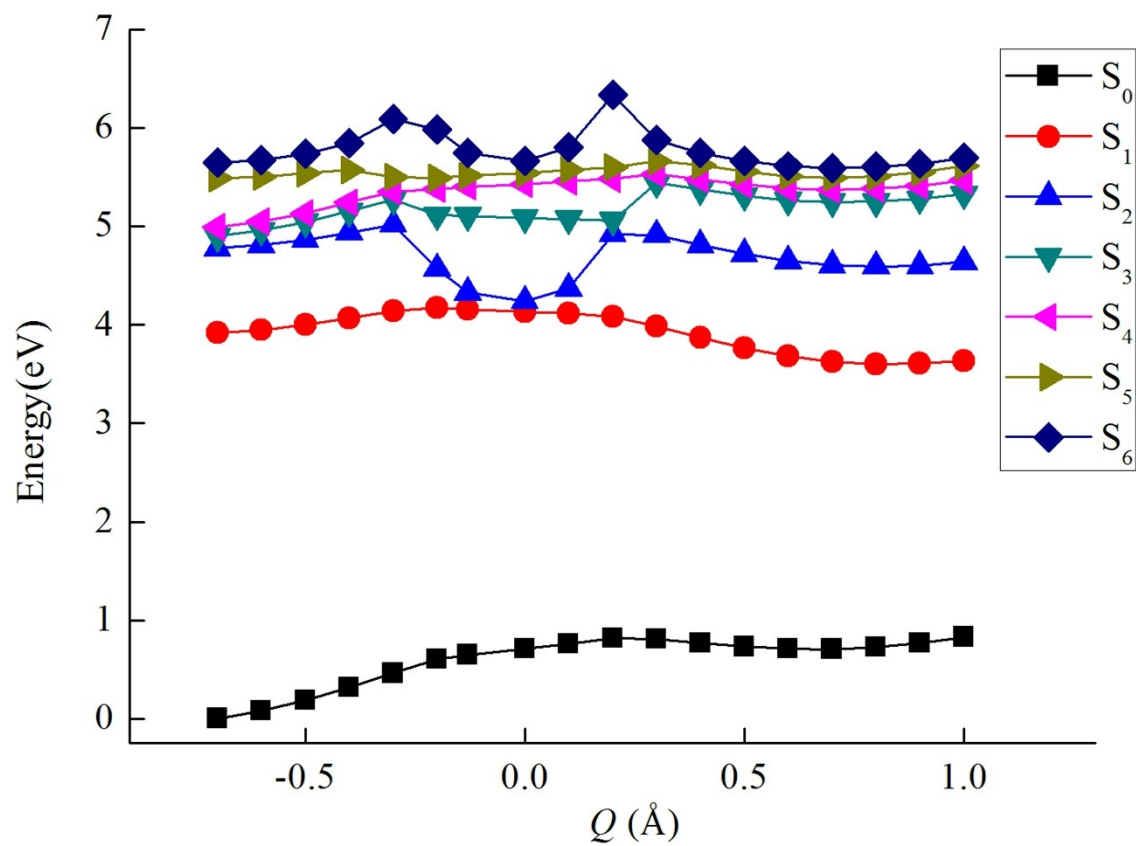

Figure S5a. Potential energy curves of the lowest 6 excited states along cMEPs as a function of the reaction coordinate  $Q$  in non-polar solvent heptane.



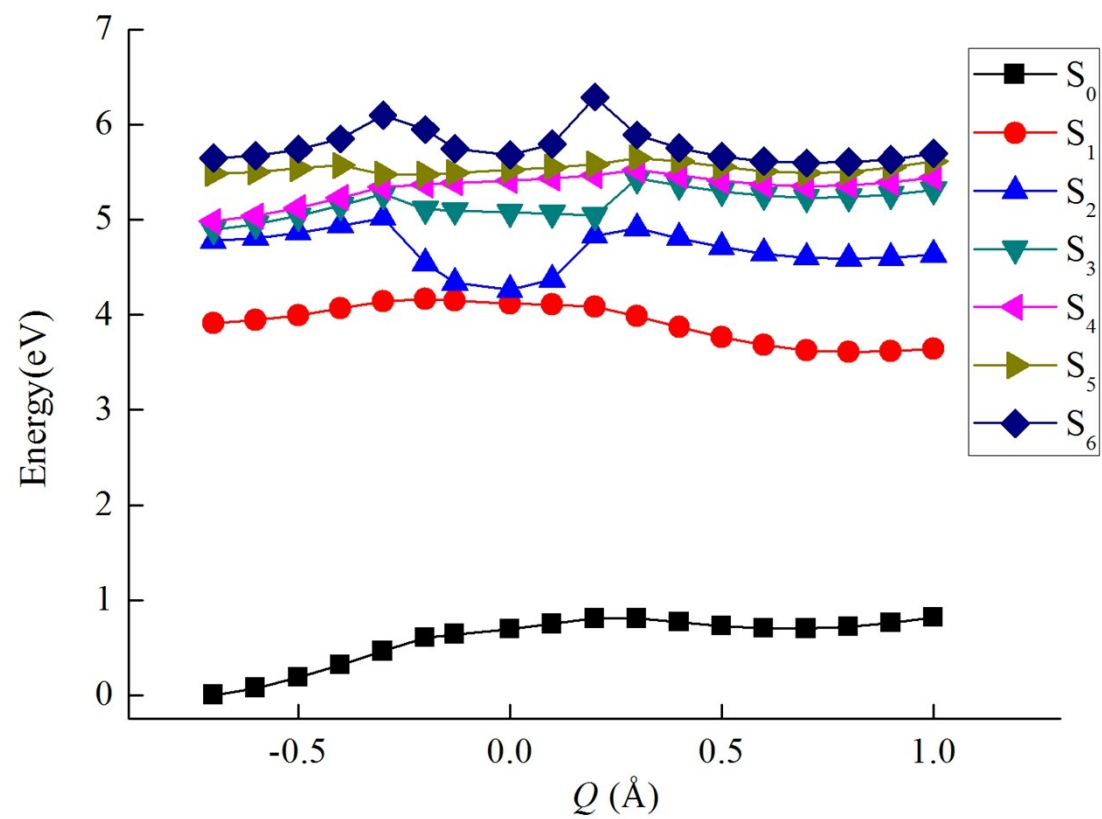

Figure S5b. Potential energy curves of the lowest 6 excited states along cMEPs as a function of the reaction coordinate  $Q$  in non-polar solvent benzene.

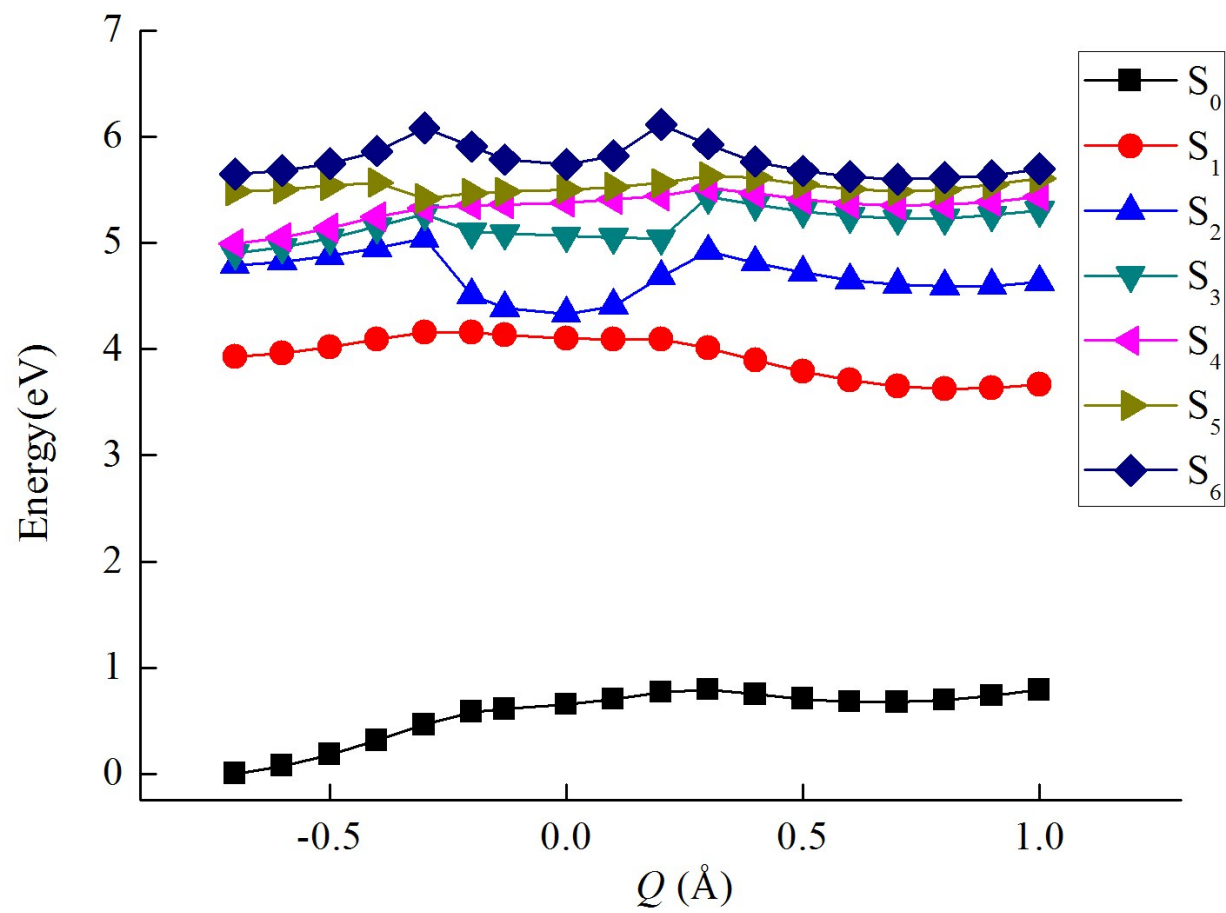

Figure S5c. Potential energy curves of the lowest 6 excited states along cMEPs as a function of the reaction coordinate  $Q$  in polar solvent diethyl ether.

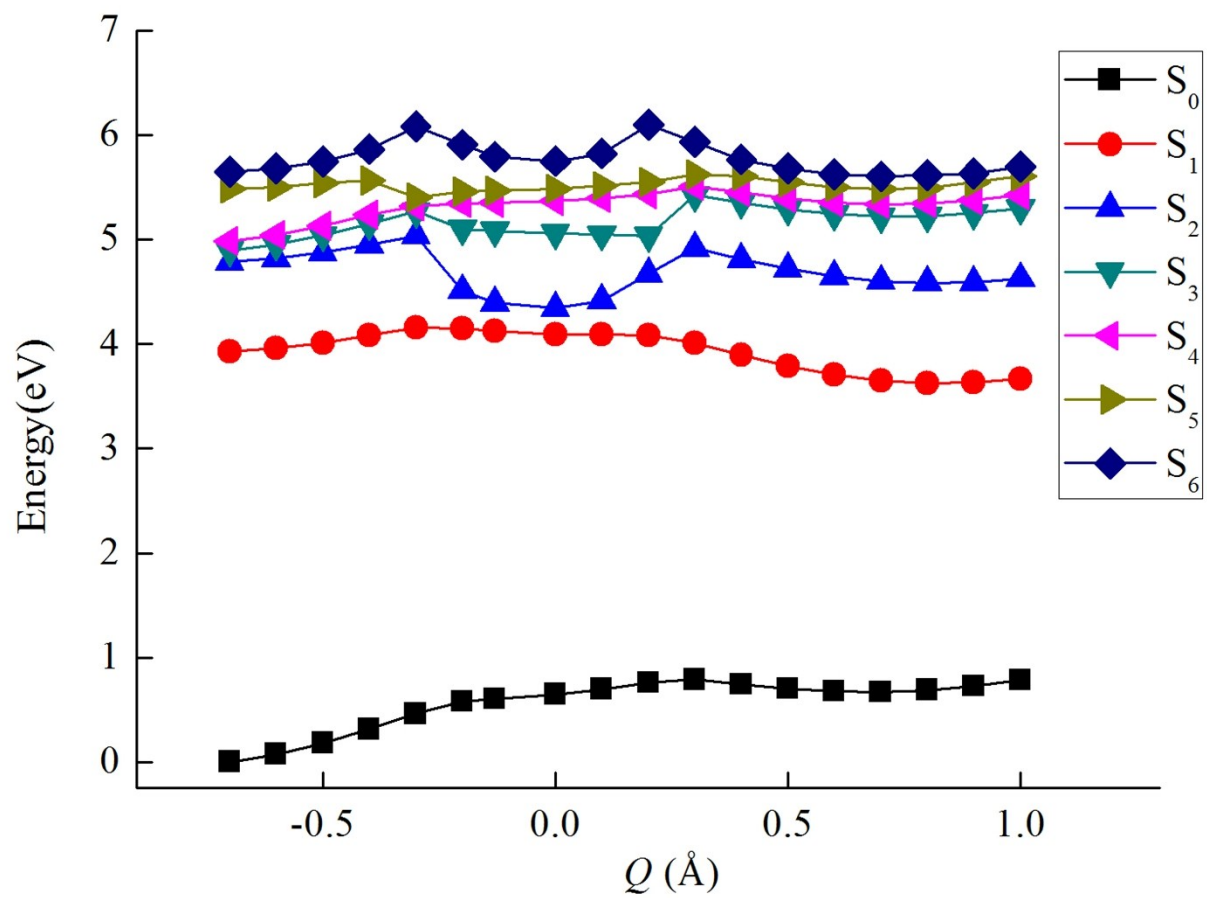

Figure S5d. Potential energy curves of the lowest 6 excited states along cMEPs as a function of the reaction coordinate  $Q$  in polar solvent chloroform.

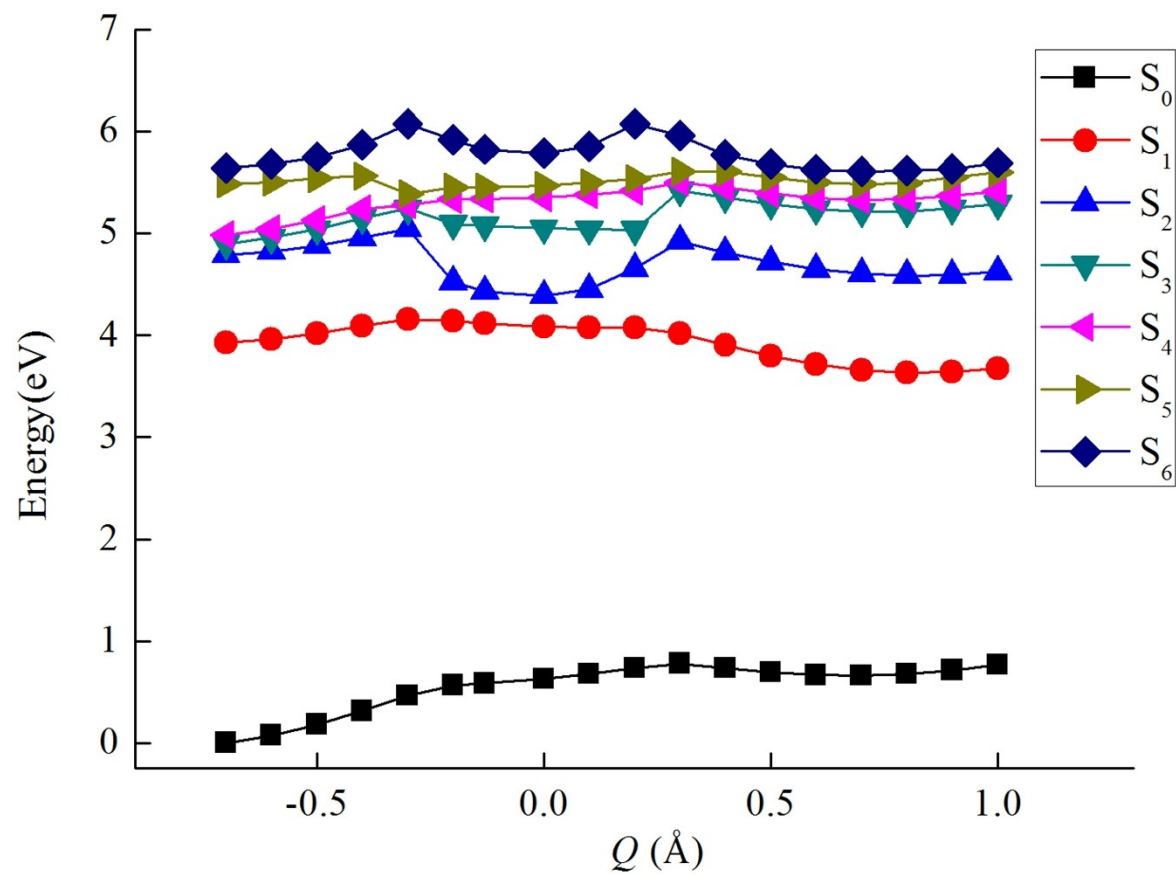

Figure S5e. Potential energy curves of the lowest 6 excited states along cMEPs as a function of the reaction coordinate  $Q$  in polar solvent dichloromethane.

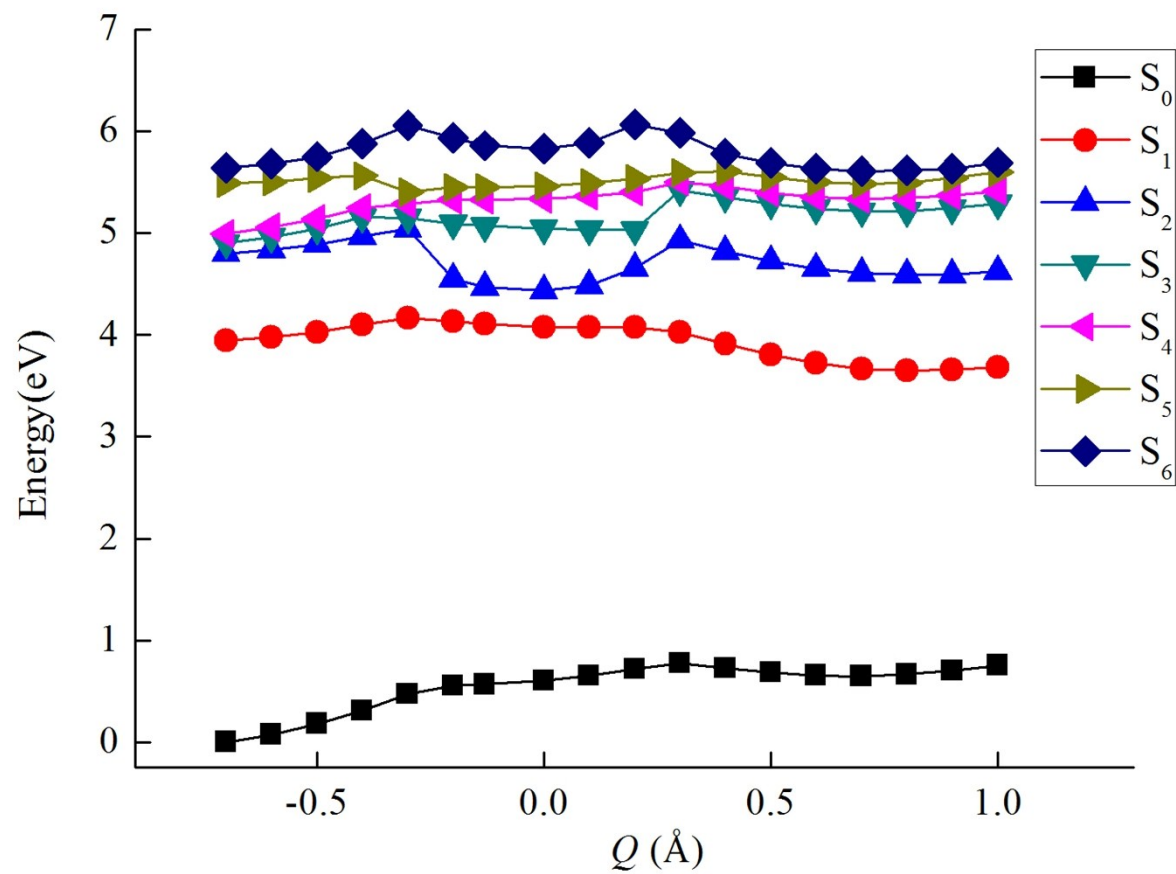

Figure S5f. Potential energy curves of the lowest 6 excited states along cMEPs as a function of the reaction coordinate  $Q$  in polar solvent methanol.

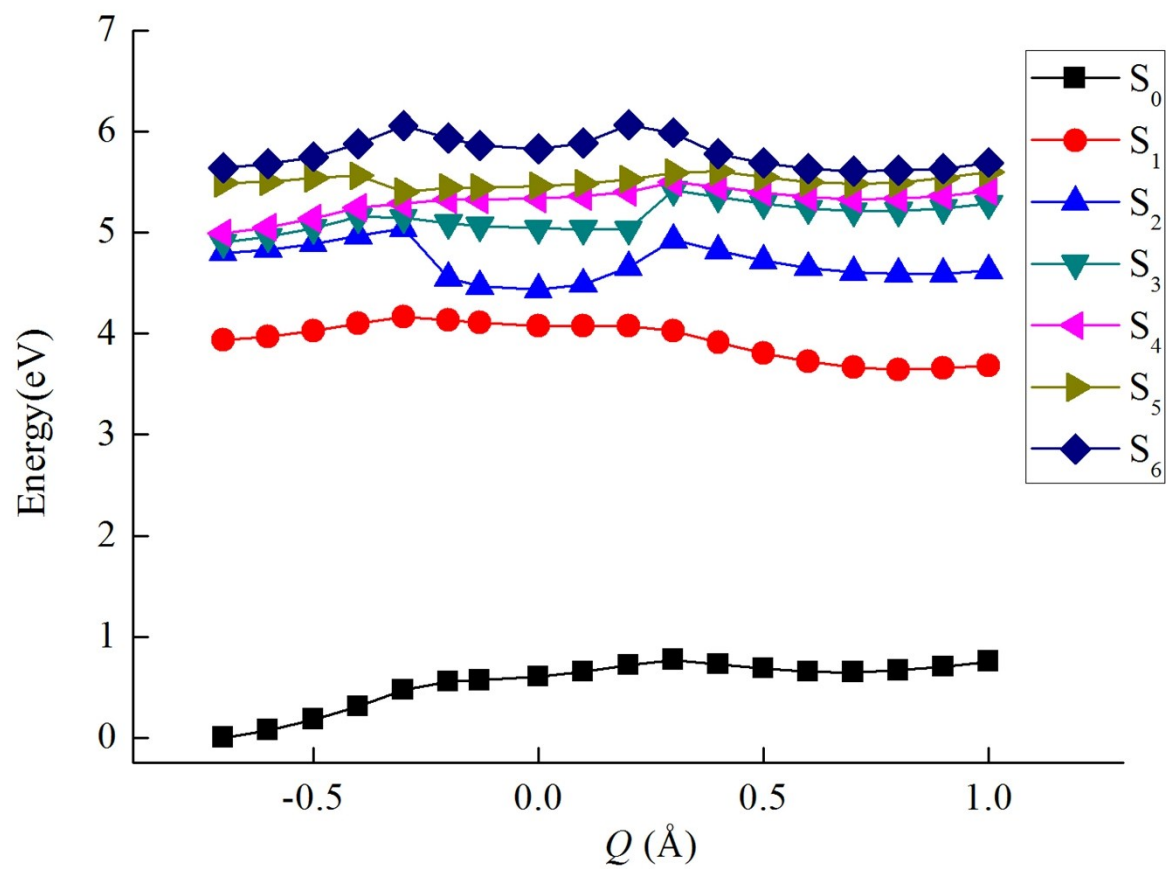

Figure S5g. Potential energy curves of the lowest 6 excited states along cMEPs as a function of the reaction coordinate  $Q$  in polar solvent acetonitrile.

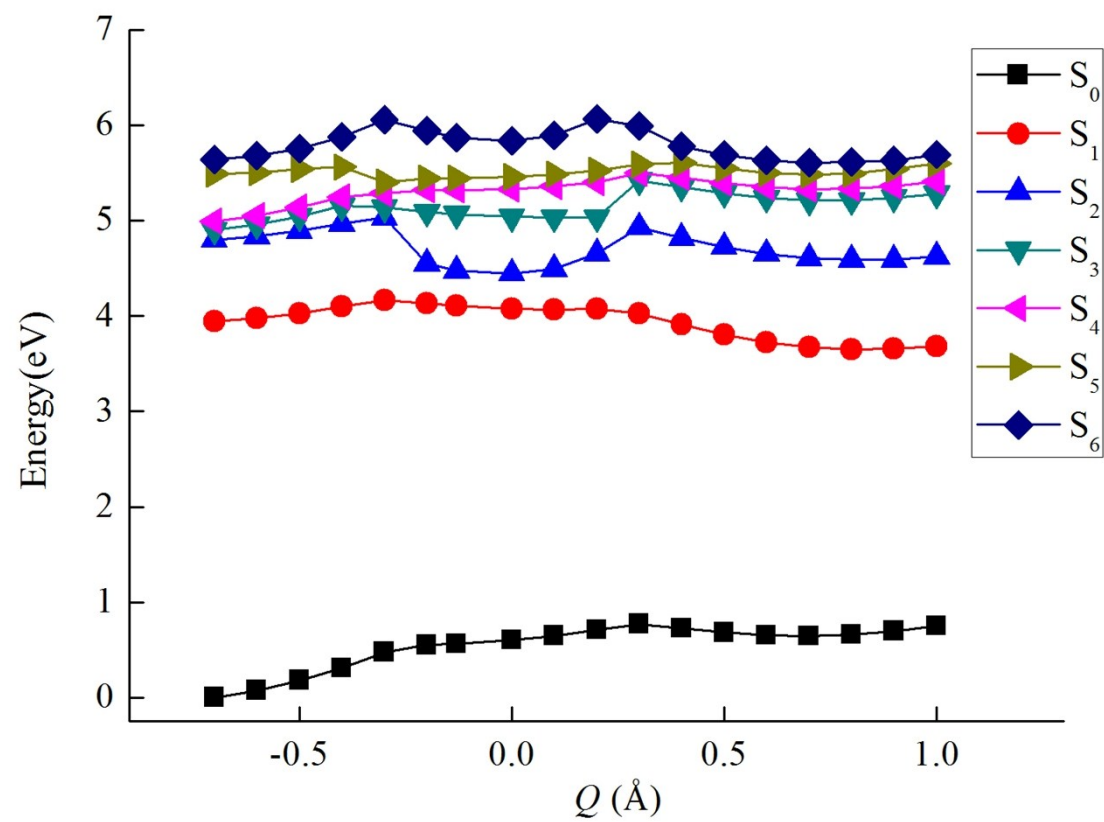

Figure S5h. Potential energy curves of the lowest 6 excited states along cMEPs as a function of the reaction coordinate  $Q$  in polar solvent water.

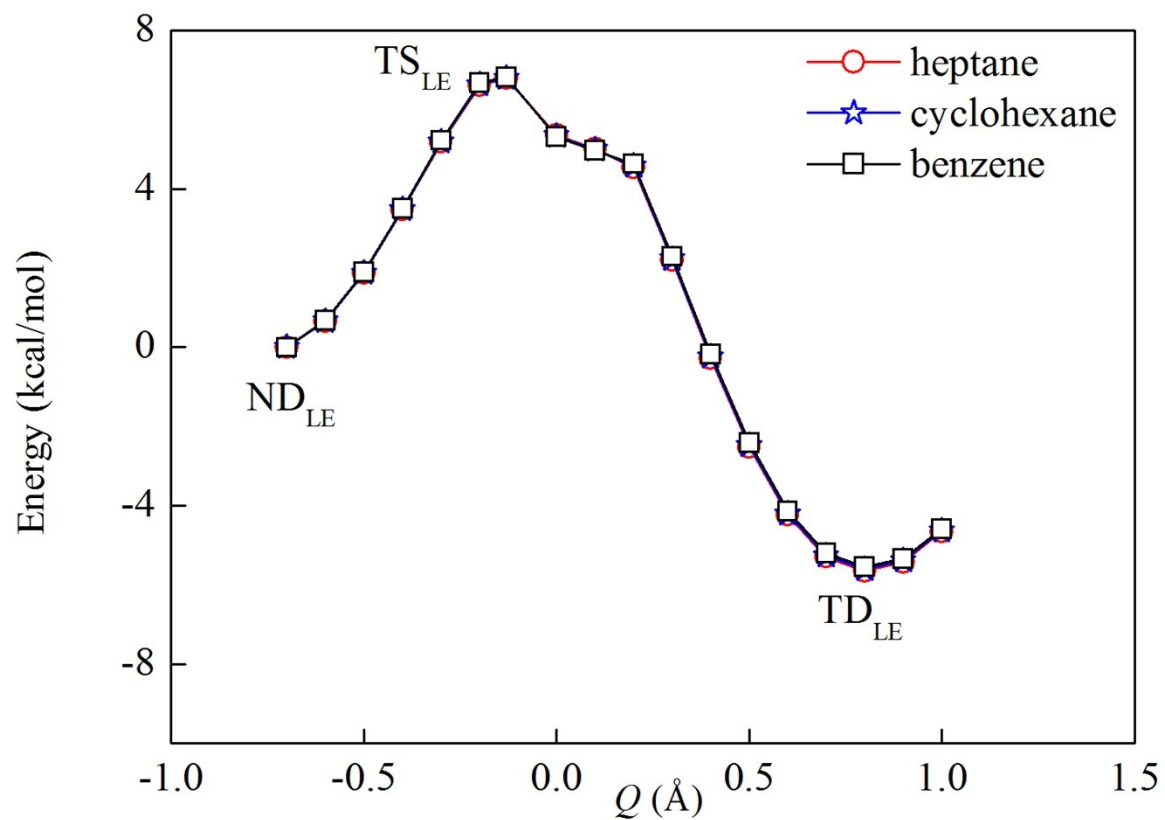

Figure S6. Potential energy curves along cMEPs in LE state as a function of the reaction coordinate  $Q$  in non-polar solvents heptane, cyclohexane and benzene considering the non-equilibrium solvent effect..



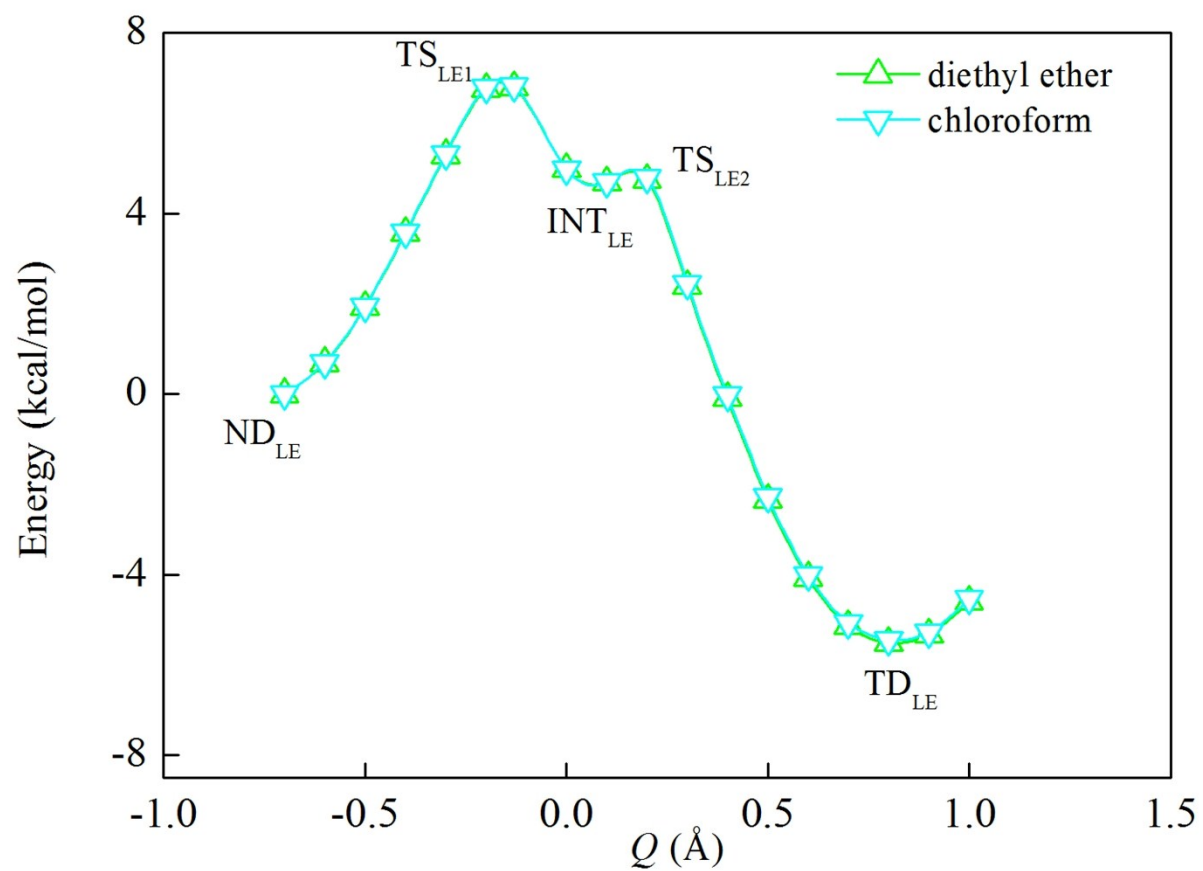

Figure S7a. Potential energy curves along cMEPs in LE state as a function of the reaction coordinate  $Q$  in polar solvents diethyl ether, and chloroform considering the non-equilibrium solvent effect.

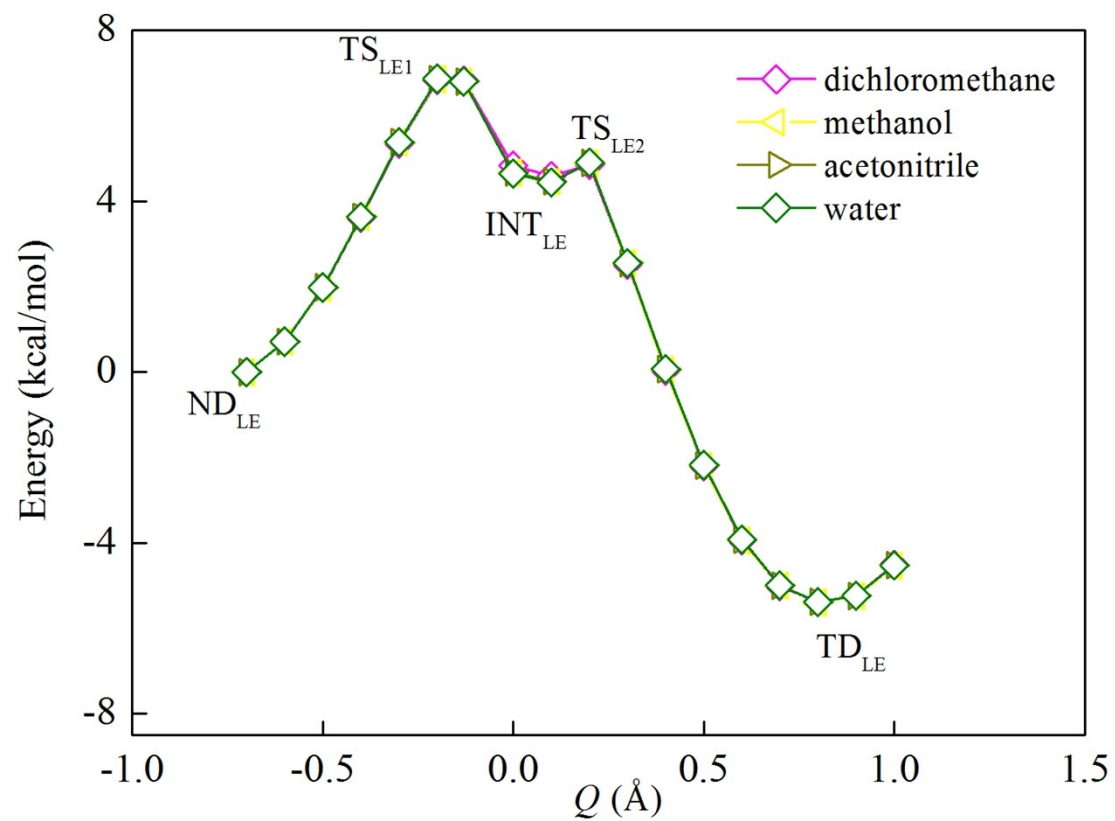

Figure S7b. Potential energy curves along cMEPs in LE state as a function of the reaction coordinate  $Q$  in polar solvents dichloromethane, methanol, acetonitrile and water considering the non-equilibrium solvent effect.



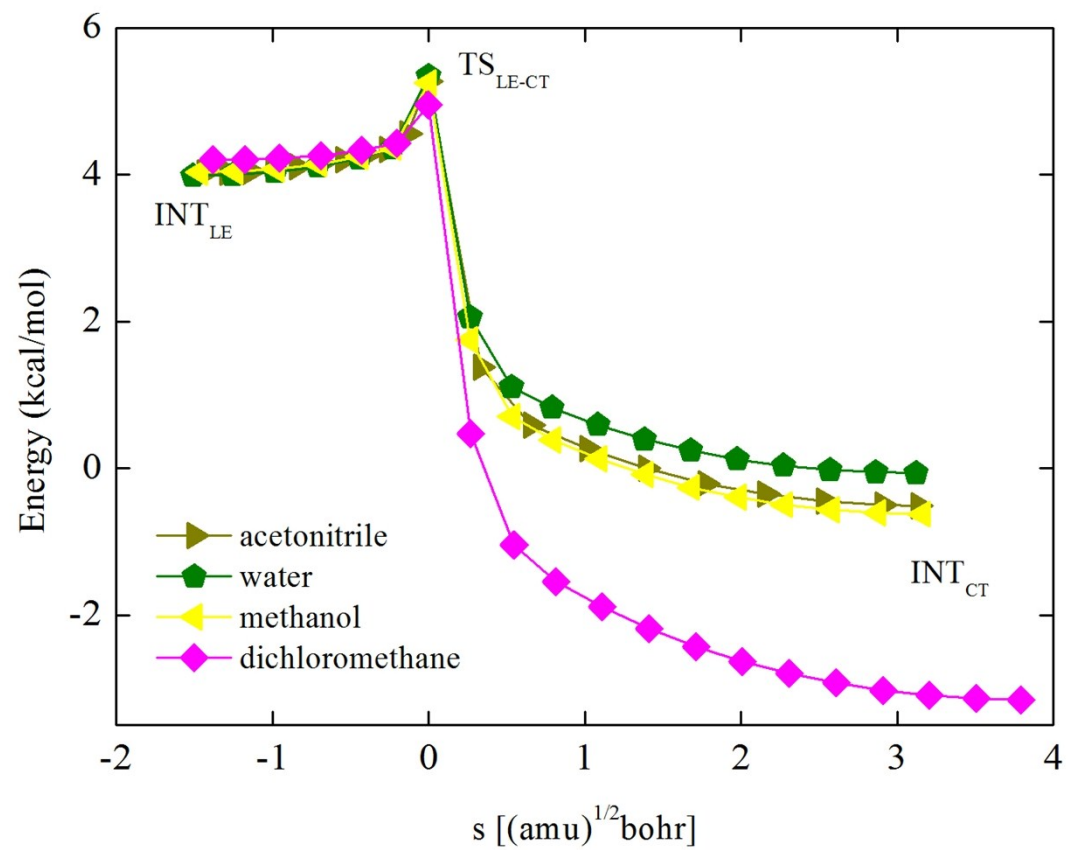

Figure S8. Potential energy profiles along IRC paths from INT<sub>CT</sub> to INT<sub>LE</sub> in polar solvents at TD-CAM-B3LYP/PCM level.
